# Supplementary material for: A descending inhibitory mechanism of nociception mediated by an evolutionarily conserved neuropeptide system in Drosophila
Source: bioRxiv preprint, doi:10.1101/2022.03.08.483420, version 3 (2023-04-13)
Supplement: Figure 7-source data 1 [file 483420_file05.xlsx]

## Sheet: Fig. 7A
Goro			MP1			Sv			IPCs
-heat	+heat		-heat	+heat		-heat	+heat		-heat	+heat
0.154936	0.71837		0.280549	0.474702		0.067629	0.175428		0.0737772	0.145992
0.18489	0.494885		0.457781	0.393784		0.07447	0.0421		0.102405	0.0721196
0.121739	0.491282		0.555009	0.205957		0.08792	0.033467		0.0520067	0.0950534
0.387025	0.264828		0.703642	0.397087		0.093191	0.07488		0.073014	0.110077
0.179215	0.401141		0.763028	0.335769		0.043365	0.031367		0.0954117	0.100746
0.167398	0.766108		0.394321	0.504371		0.140477	0.061877		0.133551	0.0485104
0.313312	0.961916		0.668398	0.39303		0.059227	0.041586		0.078387	0.146616
0.770718	1.5581		0.964233	0.509425		0.101866	0.137211		0.0962279	0.0999594
0.272534	0.739384		0.586485	1.16416		0.043211	0.132397		0.107383	0.083717
0.267865	0.860482		0.757806	0.525515			0.087285		0.0873154	0.109398
0.0886286	0.74083		0.411065	0.512536					0.065777	0.132504
0.148915	0.369366		0.609429	0.837815					0.122136	0.0605646
0.0689981	0.361762		0.418578	0.836521					0.115182	0.0942644
0.349958	0.287489		1.09562	0.695999					0.179265	0.133566
0.0419399	0.502427		0.512453	0.6244					0.0826309	0.105068
0.597452	0.659362		0.912528	0.476066					0.07687	0.145372
	0.505396		0.312997	0.85628					0.0875913
	0.209164		1.388	0.489671
	0.497927		0.507974	0.72691
	0.698696		1.37903	0.794365
			0.77912
